# Supplementary material
Source: publisher figshare collection journal article supplement (https://acs.figshare.com/ndownloader/files/4701940)
Supplement: Supplementary file 1 [file 4701940]

 
data_sun15 
 
_audit_creation_method            SHELXL-97 
_chemical_name_systematic 
; 
 ? 
; 
_chemical_name_common             ? 
_chemical_melting_point           ? 
_chemical_formula_moiety         '3(C12 H14 O4), C8 Cl2 N2 O2' 
_chemical_formula_sum            'C22 H21 Cl N O7' 
_chemical_formula_weight          446.85 
 
loop_ 
 _atom_type_symbol 
 _atom_type_description 
 _atom_type_scat_dispersion_real 
 _atom_type_scat_dispersion_imag 
 _atom_type_scat_source 
 'C'  'C'   0.0033   0.0016 
 'International Tables Vol C Tables 4.2.6.8 and 6.1.1.4' 
 'H'  'H'   0.0000   0.0000 
 'International Tables Vol C Tables 4.2.6.8 and 6.1.1.4' 
 'O'  'O'   0.0106   0.0060 
 'International Tables Vol C Tables 4.2.6.8 and 6.1.1.4' 
 'N'  'N'   0.0061   0.0033 
 'International Tables Vol C Tables 4.2.6.8 and 6.1.1.4' 
 'Cl'  'Cl'   0.1484   0.1585 
 'International Tables Vol C Tables 4.2.6.8 and 6.1.1.4' 
 
_symmetry_cell_setting            'Triclinic' 
_symmetry_space_group_name_H-M    'P -1' 
_symmetry_space_group_name_Hall    '-P 1' 
 
loop_ 
 _symmetry_equiv_pos_as_xyz 
 'x, y, z' 
 '-x, -y, -z' 
 
_cell_length_a                    10.188(3) 
_cell_length_b                    10.745(3) 
_cell_length_c                    10.888(3) 
_cell_angle_alpha                 72.261(6) 
_cell_angle_beta                  66.570(6) 
_cell_angle_gamma                 83.284(6) 
_cell_volume                      1041.7(6) 
_cell_formula_units_Z             2 
_cell_measurement_temperature     173(2) 
_cell_measurement_reflns_used     524
_cell_measurement_theta_min        2.18
_cell_measurement_theta_max       21.49

_exptl_crystal_description       'plate'
_exptl_crystal_colour            'yellow-green'
_exptl_crystal_size_min          0.02
_exptl_crystal_size_mid          0.20
_exptl_crystal_size_max          0.40
_exptl_crystal_density_meas       ? 
_exptl_crystal_density_diffrn     1.425 
_exptl_crystal_density_method     'not measured' 
_exptl_crystal_F_000              466 
_exptl_absorpt_coefficient_mu     0.229 
_exptl_absorpt_correction_type    'none' 
_exptl_absorpt_correction_T_min   ? 
_exptl_absorpt_correction_T_max   ? 
_exptl_absorpt_process_details    ? 
 
_exptl_special_details 
; 
 ? 
; 
 
_diffrn_ambient_temperature       173(2) 
_diffrn_radiation_wavelength      0.71073 
_diffrn_radiation_type            MoK\a 
_diffrn_radiation_source          'fine-focus sealed tube' 
_diffrn_radiation_monochromator   graphite 
_diffrn_measurement_device        'Siemens SMART' 
_diffrn_measurement_method        
;
\w-scan, frame range 0.3 deg, hemisphere
; 
_diffrn_standards_number          none 
_diffrn_standards_interval_count  0 
_diffrn_standards_interval_time   0 
_diffrn_standards_decay_%         0 
_diffrn_reflns_number             8861 
_diffrn_reflns_av_R_equivalents   0.0989 
_diffrn_reflns_av_sigmaI/netI     0.3495 
_diffrn_reflns_limit_h_min        -14 
_diffrn_reflns_limit_h_max        8 
_diffrn_reflns_limit_k_min        -14 
_diffrn_reflns_limit_k_max        15 
_diffrn_reflns_limit_l_min        -15 
_diffrn_reflns_limit_l_max        15 
_diffrn_reflns_theta_min          1.99 
_diffrn_reflns_theta_max          30.03 
_reflns_number_total              5801 
_reflns_number_gt                 2725 
_reflns_threshold_expression      >2sigma(I) 
 
_computing_data_collection        'SMART V5.630 (BrukerAXS, 1997-2001)'
_computing_cell_refinement        'SAINT V6.28 (BrukerAXS, 1997-2001)'
_computing_data_reduction         'SAINT & SADABS V2.06 (Sheldrick, 2000)'
_computing_structure_solution     'SHELXTL v. 6.12 (Sheldrick, 2001)'
_computing_structure_refinement   'SHELXTL v. 6.12 (Sheldrick, 2001)'
_computing_molecular_graphics     'XP V5.06 (BrukerAXS, 1997-99)'
_computing_publication_material   'SHELXL-93, XCIF V5.05 (BrukerAXS, 1997-99)'
 
_refine_special_details 
; 
 Refinement of F^2^ against ALL reflections.  The weighted R-factor wR and 
 goodness of fit S are based on F^2^, conventional R-factors R are based 
 on F, with F set to zero for negative F^2^. The threshold expression of 
 F^2^ > 2sigma(F^2^) is used only for calculating R-factors(gt) etc. and is 
 not relevant to the choice of reflections for refinement.  R-factors based 
 on F^2^ are statistically about twice as large as those based on F, and R- 
 factors based on ALL data will be even larger. 
; 
 
_refine_ls_structure_factor_coef  Fsqd  
_refine_ls_matrix_type            full 
_refine_ls_weighting_scheme       calc  
_refine_ls_weighting_details 
 'calc w=1/[\s^2^(Fo^2^)+(0.0000P)^2^+0.0000P] where P=(Fo^2^+2Fc^2^)/3' 
_atom_sites_solution_primary      direct 
_atom_sites_solution_secondary    difmap 
_atom_sites_solution_hydrogens    geom 
_refine_ls_hydrogen_treatment     constr 
_refine_ls_extinction_method      none 
_refine_ls_extinction_coef        ? 
_refine_ls_number_reflns          5801 
_refine_ls_number_parameters      313 
_refine_ls_number_restraints      6 
_refine_ls_R_factor_all           0.2275 
_refine_ls_R_factor_gt            0.0485 
_refine_ls_wR_factor_ref          0.1083 
_refine_ls_wR_factor_gt           0.0738 
_refine_ls_goodness_of_fit_ref    0.629 
_refine_ls_restrained_S_all       0.629 
_refine_ls_shift/su_max           0.001 
_refine_ls_shift/su_mean          0.000 
 
loop_ 
 _atom_site_label 
 _atom_site_type_symbol 
 _atom_site_fract_x 
 _atom_site_fract_y 
 _atom_site_fract_z 
 _atom_site_U_iso_or_equiv 
 _atom_site_adp_type 
 _atom_site_occupancy 
 _atom_site_symmetry_multiplicity 
 _atom_site_calc_flag 
 _atom_site_refinement_flags 
 _atom_site_disorder_assembly 
 _atom_site_disorder_group 
C1 C 0.2877(4) 0.4036(3) 0.1623(4) 0.0426(11) Uani 1 1 d . . . 
H1A H 0.3627 0.4050 0.0710 0.064 Uiso 1 1 calc R . . 
H1B H 0.1985 0.3706 0.1695 0.064 Uiso 1 1 calc R . . 
H1C H 0.3170 0.3465 0.2362 0.064 Uiso 1 1 calc R . . 
C2 C 0.2648(4) 0.5401(3) 0.1777(4) 0.0313(10) Uani 1 1 d . . . 
C3 C 0.2149(4) 0.6372(3) 0.0704(3) 0.0435(11) Uani 1 1 d . . . 
H3A H 0.2053 0.7238 0.0852 0.065 Uiso 1 1 calc R . . 
H3B H 0.1222 0.6089 0.0805 0.065 Uiso 1 1 calc R . . 
H3C H 0.2851 0.6412 -0.0237 0.065 Uiso 1 1 calc R . . 
C4 C 0.2115(4) 0.6223(3) 0.3572(3) 0.0249(9) Uani 1 1 d . . . 
C5 C 0.1353(4) 0.6722(3) 0.4687(3) 0.0256(9) Uani 1 1 d . . . 
H5 H 0.0387 0.6501 0.5292 0.031 Uiso 1 1 calc R . . 
C6 C 0.2173(4) 0.7587(3) 0.4815(3) 0.0229(8) Uani 1 1 d . . . 
C7 C 0.3580(4) 0.7873(3) 0.3973(3) 0.0226(8) Uani 1 1 d . . . 
C8 C 0.4335(4) 0.7387(3) 0.2846(3) 0.0239(9) Uani 1 1 d . . . 
H8 H 0.5299 0.7612 0.2239 0.029 Uiso 1 1 calc R . . 
C9 C 0.3514(4) 0.6534(3) 0.2709(3) 0.0240(9) Uani 1 1 d . . . 
C10 C 0.2848(4) 0.9235(3) 0.5342(3) 0.0260(9) Uani 1 1 d . . . 
C11 C 0.3115(4) 0.9245(3) 0.6612(3) 0.0331(9) Uani 1 1 d . . . 
H11A H 0.3347 0.8360 0.7068 0.050 Uiso 1 1 calc R . . 
H11B H 0.2255 0.9549 0.7266 0.050 Uiso 1 1 calc R . . 
H11C H 0.3916 0.9835 0.6322 0.050 Uiso 1 1 calc R . . 
C12 C 0.2455(4) 1.0544(3) 0.4556(3) 0.0348(10) Uani 1 1 d . . . 
H12A H 0.3221 1.1176 0.4247 0.052 Uiso 1 1 calc R . . 
H12B H 0.1563 1.0850 0.5169 0.052 Uiso 1 1 calc R . . 
H12C H 0.2324 1.0456 0.3741 0.052 Uiso 1 1 calc R . . 
O1 O 0.1597(3) 0.5367(2) 0.3163(2) 0.0325(6) Uani 1 1 d . . . 
O2 O 0.3966(3) 0.5887(2) 0.1684(2) 0.0301(6) Uani 1 1 d . . . 
O3 O 0.1689(2) 0.8290(2) 0.5793(2) 0.0286(6) Uani 1 1 d . . . 
O4 O 0.4099(2) 0.8737(2) 0.4390(2) 0.0280(6) Uani 1 1 d . . . 
Cl1 Cl 0.7784(7) 0.4835(6) 0.2202(6) 0.0445(11) Uani 0.50 1 d PD A 1 
Cl2 Cl 0.7921(6) 0.6706(5) 0.3880(5) 0.0431(10) Uani 0.50 1 d PD B 1 
C22 C 0.7375(15) 0.6381(16) 0.4333(14) 0.037(5) Uani 0.50 1 d PD B 2 
C23 C 0.7282(16) 0.4616(14) 0.2796(13) 0.055(6) Uani 0.50 1 d PD A 2 
N1 N 0.8375(14) 0.7011(14) 0.3890(14) 0.056(4) Uani 0.50 1 d PD B 2 
N2 N 0.8301(18) 0.466(2) 0.1838(18) 0.049(4) Uani 0.50 1 d PD A 2 
O7 O 0.4898(3) 0.3421(2) 0.3551(3) 0.0489(8) Uani 1 1 d . B . 
C19 C 0.6295(5) 0.5684(4) 0.4573(4) 0.0403(11) Uani 1 1 d D . . 
C20 C 0.6246(5) 0.4883(4) 0.3832(4) 0.0415(12) Uani 1 1 d D A . 
C21 C 0.4946(5) 0.4141(3) 0.4225(4) 0.0441(11) Uani 1 1 d . . . 
C13 C 0.0817(4) -0.0271(3) 0.2123(3) 0.0348(10) Uani 1 1 d . . . 
H13A H 0.1505 -0.0903 0.2381 0.052 Uiso 1 1 calc R . . 
H13B H 0.0118 -0.0725 0.1999 0.052 Uiso 1 1 calc R . . 
H13C H 0.0320 0.0155 0.2863 0.052 Uiso 1 1 calc R . . 
C14 C 0.1596(4) 0.0744(3) 0.0779(3) 0.0271(9) Uani 1 1 d . . . 
C15 C 0.0629(4) 0.1725(3) 0.0239(4) 0.0415(11) Uani 1 1 d . . . 
H15A H 0.0092 0.2197 0.0928 0.062 Uiso 1 1 calc R . . 
H15B H -0.0039 0.1271 0.0076 0.062 Uiso 1 1 calc R . . 
H15C H 0.1207 0.2346 -0.0639 0.062 Uiso 1 1 calc R . . 
C16 C 0.3873(4) 0.0731(3) 0.0564(3) 0.0229(8) Uani 1 1 d . . . 
C17 C 0.3775(4) -0.0071(3) -0.0187(3) 0.0238(8) Uani 1 1 d . . . 
C18 C 0.4903(4) -0.0822(3) -0.0776(3) 0.0293(9) Uani 1 1 d . . . 
H18 H 0.4841 -0.1366 -0.1295 0.035 Uiso 1 1 calc R . . 
O5 O 0.2625(3) 0.1408(2) 0.0960(2) 0.0310(6) Uani 1 1 d . . . 
O6 O 0.2458(2) 0.0090(2) -0.0283(2) 0.0292(6) Uani 1 1 d . . . 
 
loop_ 
 _atom_site_aniso_label 
 _atom_site_aniso_U_11 
 _atom_site_aniso_U_22 
 _atom_site_aniso_U_33 
 _atom_site_aniso_U_23 
 _atom_site_aniso_U_13 
 _atom_site_aniso_U_12 
C1 0.065(3) 0.031(2) 0.045(3) -0.020(2) -0.028(2) 0.003(2) 
C2 0.042(3) 0.027(2) 0.035(2) -0.0161(19) -0.021(2) 0.0012(19) 
C3 0.069(3) 0.034(2) 0.041(2) -0.012(2) -0.034(2) 0.002(2) 
C4 0.034(3) 0.0190(19) 0.024(2) -0.0057(16) -0.0126(19) -0.0053(17) 
C5 0.030(2) 0.022(2) 0.025(2) -0.0056(17) -0.0100(18) -0.0037(17) 
C6 0.036(3) 0.0161(19) 0.0212(19) -0.0098(16) -0.0139(18) 0.0041(17) 
C7 0.034(3) 0.0132(18) 0.027(2) -0.0069(16) -0.017(2) -0.0011(17) 
C8 0.035(3) 0.0170(18) 0.0216(19) -0.0057(16) -0.0120(18) -0.0018(17) 
C9 0.039(3) 0.0196(19) 0.0191(19) -0.0079(16) -0.0144(19) 0.0003(17) 
C10 0.027(2) 0.029(2) 0.028(2) -0.0134(18) -0.0113(19) -0.0038(17) 
C11 0.040(3) 0.034(2) 0.033(2) -0.0137(18) -0.018(2) -0.0043(18) 
C12 0.049(3) 0.025(2) 0.034(2) -0.0105(18) -0.019(2) 0.0021(18) 
O1 0.0452(18) 0.0298(15) 0.0324(15) -0.0143(12) -0.0188(14) -0.0076(12) 
O2 0.0444(18) 0.0262(13) 0.0277(14) -0.0153(11) -0.0165(13) 0.0011(12) 
O3 0.0363(17) 0.0230(13) 0.0296(14) -0.0144(11) -0.0094(12) -0.0053(11) 
O4 0.0349(16) 0.0252(13) 0.0288(14) -0.0171(12) -0.0094(13) -0.0026(11) 
Cl1 0.051(4) 0.040(2) 0.040(4) -0.008(2) -0.015(2) -0.006(3) 
Cl2 0.059(4) 0.037(3) 0.041(2) -0.012(2) -0.024(2) -0.006(2) 
C22 0.070(14) 0.023(9) 0.022(7) -0.006(6) -0.026(8) 0.018(7) 
C23 0.106(18) 0.016(5) 0.062(12) 0.014(8) -0.062(11) -0.029(8) 
N1 0.091(11) 0.039(8) 0.070(7) -0.023(5) -0.058(7) 0.005(6) 
N2 0.060(12) 0.051(9) 0.043(9) -0.005(6) -0.027(7) -0.016(8) 
O7 0.073(2) 0.0377(16) 0.073(2) -0.0341(16) -0.0568(18) 0.0172(15) 
C19 0.056(3) 0.029(2) 0.064(3) -0.029(2) -0.043(3) 0.011(2) 
C20 0.053(3) 0.042(3) 0.052(3) -0.029(2) -0.037(3) 0.020(2) 
C21 0.071(3) 0.027(2) 0.065(3) -0.028(2) -0.053(3) 0.021(2) 
C13 0.044(3) 0.031(2) 0.031(2) -0.0098(19) -0.014(2) -0.0030(19) 
C14 0.026(2) 0.032(2) 0.031(2) -0.0180(18) -0.0146(19) 0.0044(18) 
C15 0.054(3) 0.030(2) 0.052(3) -0.016(2) -0.031(2) 0.006(2) 
C16 0.028(2) 0.0183(19) 0.025(2) -0.0081(16) -0.0114(18) 0.0003(17) 
C17 0.024(2) 0.023(2) 0.027(2) -0.0067(17) -0.0133(18) -0.0027(17) 
C18 0.043(3) 0.023(2) 0.024(2) -0.0123(17) -0.0094(19) -0.0049(18) 
O5 0.0351(17) 0.0269(14) 0.0380(15) -0.0164(12) -0.0163(13) 0.0020(12) 
O6 0.0303(17) 0.0333(15) 0.0297(14) -0.0163(12) -0.0119(13) 0.0003(12) 
 
_geom_special_details 
; 
 All esds (except the esd in the dihedral angle between two l.s. planes) 
 are estimated using the full covariance matrix.  The cell esds are taken 
 into account individually in the estimation of esds in distances, angles 
 and torsion angles; correlations between esds in cell parameters are only 
 used when they are defined by crystal symmetry.  An approximate (isotropic) 
 treatment of cell esds is used for estimating esds involving l.s. planes. 
; 
 
loop_ 
 _geom_bond_atom_site_label_1 
 _geom_bond_atom_site_label_2 
 _geom_bond_distance 
 _geom_bond_site_symmetry_2 
 _geom_bond_publ_flag 
C1 C2 1.508(4) . ? 
C1 H1A 0.9800 . ? 
C1 H1B 0.9800 . ? 
C1 H1C 0.9800 . ? 
C2 O2 1.453(4) . ? 
C2 O1 1.454(4) . ? 
C2 C3 1.522(4) . ? 
C3 H3A 0.9800 . ? 
C3 H3B 0.9800 . ? 
C3 H3C 0.9800 . ? 
C4 O1 1.369(3) . ? 
C4 C9 1.372(4) . ? 
C4 C5 1.384(4) . ? 
C5 C6 1.391(4) . ? 
C5 H5 0.9500 . ? 
C6 C7 1.370(4) . ? 
C6 O3 1.390(3) . ? 
C7 O4 1.382(3) . ? 
C7 C8 1.384(4) . ? 
C8 C9 1.387(4) . ? 
C8 H8 0.9500 . ? 
C9 O2 1.389(3) . ? 
C10 O4 1.454(4) . ? 
C10 O3 1.476(4) . ? 
C10 C12 1.510(4) . ? 
C10 C11 1.515(4) . ? 
C11 H11A 0.9800 . ? 
C11 H11B 0.9800 . ? 
C11 H11C 0.9800 . ? 
C12 H12A 0.9800 . ? 
C12 H12B 0.9800 . ? 
C12 H12C 0.9800 . ? 
Cl1 C20 1.853(5) . ? 
Cl2 C19 1.856(5) . ? 
C22 N1 1.139(9) . ? 
C22 C19 1.298(7) . ? 
C23 N2 1.136(9) . ? 
C23 C20 1.284(8) . ? 
O7 C21 1.234(3) . ? 
C19 C20 1.363(4) . ? 
C19 C21 1.458(5) 2_666 ? 
C20 C21 1.471(5) . ? 
C21 C19 1.458(5) 2_666 ? 
C13 C14 1.506(4) . ? 
C13 H13A 0.9800 . ? 
C13 H13B 0.9800 . ? 
C13 H13C 0.9800 . ? 
C14 O5 1.440(4) . ? 
C14 O6 1.464(3) . ? 
C14 C15 1.506(4) . ? 
C15 H15A 0.9800 . ? 
C15 H15B 0.9800 . ? 
C15 H15C 0.9800 . ? 
C16 O5 1.367(4) . ? 
C16 C18 1.374(4) 2_655 ? 
C16 C17 1.391(4) . ? 
C17 O6 1.373(4) . ? 
C17 C18 1.377(4) . ? 
C18 C16 1.374(4) 2_655 ? 
C18 H18 0.9500 . ? 
 
loop_ 
 _geom_angle_atom_site_label_1 
 _geom_angle_atom_site_label_2 
 _geom_angle_atom_site_label_3 
 _geom_angle 
 _geom_angle_site_symmetry_1 
 _geom_angle_site_symmetry_3 
 _geom_angle_publ_flag 
C2 C1 H1A 109.5 . . ? 
C2 C1 H1B 109.5 . . ? 
H1A C1 H1B 109.5 . . ? 
C2 C1 H1C 109.5 . . ? 
H1A C1 H1C 109.5 . . ? 
H1B C1 H1C 109.5 . . ? 
O2 C2 O1 106.2(2) . . ? 
O2 C2 C1 109.5(3) . . ? 
O1 C2 C1 109.4(3) . . ? 
O2 C2 C3 108.7(3) . . ? 
O1 C2 C3 108.5(3) . . ? 
C1 C2 C3 114.2(3) . . ? 
C2 C3 H3A 109.5 . . ? 
C2 C3 H3B 109.5 . . ? 
H3A C3 H3B 109.5 . . ? 
C2 C3 H3C 109.5 . . ? 
H3A C3 H3C 109.5 . . ? 
H3B C3 H3C 109.5 . . ? 
O1 C4 C9 110.3(3) . . ? 
O1 C4 C5 125.7(3) . . ? 
C9 C4 C5 124.0(3) . . ? 
C4 C5 C6 111.8(3) . . ? 
C4 C5 H5 124.1 . . ? 
C6 C5 H5 124.1 . . ? 
C7 C6 O3 110.5(3) . . ? 
C7 C6 C5 124.1(3) . . ? 
O3 C6 C5 125.4(3) . . ? 
C6 C7 O4 110.1(3) . . ? 
C6 C7 C8 124.0(3) . . ? 
O4 C7 C8 125.9(3) . . ? 
C7 C8 C9 111.9(3) . . ? 
C7 C8 H8 124.1 . . ? 
C9 C8 H8 124.1 . . ? 
C4 C9 C8 124.2(3) . . ? 
C4 C9 O2 110.1(3) . . ? 
C8 C9 O2 125.7(3) . . ? 
O4 C10 O3 105.5(2) . . ? 
O4 C10 C12 109.0(3) . . ? 
O3 C10 C12 108.9(3) . . ? 
O4 C10 C11 109.9(3) . . ? 
O3 C10 C11 108.5(3) . . ? 
C12 C10 C11 114.7(3) . . ? 
C10 C11 H11A 109.5 . . ? 
C10 C11 H11B 109.5 . . ? 
H11A C11 H11B 109.5 . . ? 
C10 C11 H11C 109.5 . . ? 
H11A C11 H11C 109.5 . . ? 
H11B C11 H11C 109.5 . . ? 
C10 C12 H12A 109.5 . . ? 
C10 C12 H12B 109.5 . . ? 
H12A C12 H12B 109.5 . . ? 
C10 C12 H12C 109.5 . . ? 
H12A C12 H12C 109.5 . . ? 
H12B C12 H12C 109.5 . . ? 
C4 O1 C2 104.6(2) . . ? 
C9 O2 C2 103.9(2) . . ? 
C6 O3 C10 104.7(2) . . ? 
C7 O4 C10 105.7(2) . . ? 
N1 C22 C19 168.3(16) . . ? 
N2 C23 C20 164(2) . . ? 
C22 C19 C20 127.1(8) . . ? 
C22 C19 C21 111.4(8) . 2_666 ? 
C20 C19 C21 121.5(4) . 2_666 ? 
C22 C19 Cl2 10.8(7) . . ? 
C20 C19 Cl2 117.8(4) . . ? 
C21 C19 Cl2 120.2(3) 2_666 . ? 
C23 C20 C19 126.9(9) . . ? 
C23 C20 C21 111.6(9) . . ? 
C19 C20 C21 121.4(4) . . ? 
C23 C20 Cl1 10.8(7) . . ? 
C19 C20 Cl1 119.7(5) . . ? 
C21 C20 Cl1 118.6(4) . . ? 
O7 C21 C19 121.5(4) . 2_666 ? 
O7 C21 C20 121.5(4) . . ? 
C19 C21 C20 117.0(3) 2_666 . ? 
C14 C13 H13A 109.5 . . ? 
C14 C13 H13B 109.5 . . ? 
H13A C13 H13B 109.5 . . ? 
C14 C13 H13C 109.5 . . ? 
H13A C13 H13C 109.5 . . ? 
H13B C13 H13C 109.5 . . ? 
O5 C14 O6 104.5(3) . . ? 
O5 C14 C15 109.8(3) . . ? 
O6 C14 C15 109.5(3) . . ? 
O5 C14 C13 109.4(3) . . ? 
O6 C14 C13 109.1(3) . . ? 
C15 C14 C13 114.0(3) . . ? 
C14 C15 H15A 109.5 . . ? 
C14 C15 H15B 109.5 . . ? 
H15A C15 H15B 109.5 . . ? 
C14 C15 H15C 109.5 . . ? 
H15A C15 H15C 109.5 . . ? 
H15B C15 H15C 109.5 . . ? 
O5 C16 C18 128.2(3) . 2_655 ? 
O5 C16 C17 109.4(3) . . ? 
C18 C16 C17 122.4(3) 2_655 . ? 
O6 C17 C18 128.6(3) . . ? 
O6 C17 C16 109.2(3) . . ? 
C18 C17 C16 122.1(3) . . ? 
C16 C18 C17 115.5(3) 2_655 . ? 
C16 C18 H18 122.3 2_655 . ? 
C17 C18 H18 122.3 . . ? 
C16 O5 C14 105.5(2) . . ? 
C17 O6 C14 104.7(2) . . ? 
 
_diffrn_measured_fraction_theta_max    0.952 
_diffrn_reflns_theta_full              30.03 
_diffrn_measured_fraction_theta_full   0.952 
_refine_diff_density_max    0.224 
_refine_diff_density_min   -0.215 
_refine_diff_density_rms    0.051 
